# Supplementary material for: Evolution of H5N1 influenza virus through proteotyping of hemagglutinin with high resolution mass spectrometry
Source: Royal Society of Chemistry journal article supplement (doi:10.1039/c1an15354d), 2011-01-01
Supplement: c1an15354d.pdf [file c1an15354d.pdf]

**Evolution of H5N1 Influenza Virus  
through Proteotyping of Hemagglutinin  
with High Resolution Mass Spectrometry**

Ji-Won Ha and Kevin M. Downard\*

School of Molecular Bioscience  
University of Sydney, Sydney, NSW, Australia

\*Address for correspondence:

Assoc. Prof. Kevin Downard  
School of Molecular Bioscience G-08  
University of Sydney  
Sydney, NSW 2006  
AUSTRALIA

Tel. +61 (0)2 9351 4140  
email [k.downard@sydney.edu.au](mailto:k.downard@sydney.edu.au)

Table S1

Host-specific correlation table of all avian (1507) versus human (222) H5 hemagglutinin sequences from all regions 1997-2010 showing the frequency of occurrence (Po) of peptides in each host

| Residues | Sequence #                  | <i>m/z</i> [M+H] <sup>+</sup><br>monoisotopic | Avian<br>Po | Human<br>Po | ΔPo   |
|----------|-----------------------------|-----------------------------------------------|-------------|-------------|-------|
| 276-282  | GDSTIMK                     | 751.3654                                      | 0.61        | 0.56        | 0.05  |
| 517-523  | EEISGVK                     | 761.4039                                      | 0.96        | 0.98        | -0.02 |
| 333-339  | NSPQGER                     | 787.3693                                      | 0.41        | 0.32        | 0.09  |
| 124-129  | INHFEK                      | 787.4097                                      | 0.87        | 1.00        | -0.13 |
| 398-404  | VNSIIDK                     | 788.4512                                      | 0.96        | 0.98        | -0.02 |
| 390-397  | AIDGVTNK                    | 817.4414                                      | 0.96        | 0.99        | -0.02 |
| 327-334  | LVLATGLR                    | 842.5458                                      | 0.98        | 0.97        | 0.00  |
| 162-168  | NVVWLIK                     | 871.5400                                      | 0.89        | 0.80        | 0.09  |
| 415-421  | EFNNLER                     | 921.4424                                      | 0.93        | 0.95        | -0.02 |
| 168-175  | DNAYPTIK                    | 921.4676                                      | 0.25        | 0.17        | 0.08  |
| 170-177  | NSTYPTIK                    | 923.4833                                      | 0.21        | 0.51        | -0.30 |
| 405-414  | MNTQFEAVGR                  | 1152.5466                                     | 0.97        | 0.99        | -0.02 |
| 453-462  | TLDFHDSNVK                  | 1175.5691                                     | 0.99        | 1           | -0.01 |
| 490-499  | CDNECMESVR                  | 1185.4332                                     | 0.74        | 0.67        | 0.07  |
| 283-293  | SELEYGNCNTK                 | 1257.5416                                     | 0.76        | 0.78        | -0.02 |
| 478-489  | ELGNGCFEFYHK                | 1443.6361                                     | 0.53        | 0.69        | -0.17 |
| 57-69    | LCDLDGVKPLILR               | 1454.8400                                     | 0.85        | 0.76        | 0.10  |
| 39-51    | NVTVTHAQDILEK               | 1467.7802                                     | 0.96        | 0.98        | -0.02 |
| 500-513  | NGTYDYPQYSEEAR              | 1692.7136                                     | 0.76        | 0.66        | 0.09  |
| 206-224  | LYQNPTTYISVGTSTLNQR         | 2156.0981                                     | 0.74        | 0.66        | 0.08  |
| 134-154  | SSWSDHEASSGVSSACPYQGR       | 2197.9204                                     | 0.24        | 0.09        | 0.14  |
| 83-102   | ANPTNDLCYPGSFNDYEELK        | 2289.9968                                     | 0.01        | 0.23        | -0.22 |
| 97-116   | INPANDLCYPGNFNDYEELK        | 2329.0442                                     | 0.30        | 0.22        | 0.08  |
| 1-222    | DQICIGYHANNSTEQVDTIMEK      | 2509.1333                                     | 0.93        | 0.96        | -0.03 |
| 120-145  | SSWSDHEASSGVSSACPYLGSPSFFR  | 2748.1995                                     | 0.03        | 0.23        | -0.20 |
| 430-452  | MEDGFLDVWTYNAELLVLMENER     | 2787.3003                                     | 0.99        | 0.99        | -0.01 |
| 292-318  | CQTPIGAINSSMPFHNIHPLTIGECPK | 2905.4158                                     | 0.52        | 0.41        | 0.10  |
| 278-304  | CQTPMGAINSSMPFHNIHPLTIGECPK | 2923.3721                                     | 0.42        | 0.55        | -0.13 |

# Sequences used to establish residue positions were: A/HongKong/483/1997 (AAF74330),  
 A/HongKong/213/1997 (ABP51975), A/CygnusOlor/742/2006 (ABD52284),  
 A/Indonesia/CDC742/2006 (ABI49407)
